# Supplementary material for: Response of soil oxides in complex terrain region to environment revealed by hyperspectral observations
Source: Frontiers journal article supplement (doi:10.3389/fenvs.2023.1138177), 2023-07-28
Supplement: Table_1.XLSX [file Table_1.XLSX]

## Sheet: 结果页
Number			SiO2	Al2O3	TFe2O3	MgO	CaO	Na2O	K2O	TC	Corg.	pH	Au
	XX	YY	ng/g	ng/g	ng/g	ng/g	ng/g	ng/g	ng/g	ng/g	ng/g	/	ng/g
1008	347000	3151000	63.96	16.74	7.15	0.93	0.26	0.13	1.87	1.82	1.62	5.77	3.3
1032	345000	3149000	60.94	17.76	8	0.91	0.27	0.12	1.93	1.67	1.45	5.82	3.3
1033	347000	3149000	63.75	16.38	7.33	1.07	0.62	0.13	1.7	1.49	1.29	7.38	3.3
1056	343000	3147000	66.21	16.53	5.95	1.83	0.5	0.32	3.58	3.01	2.9	5.89	2.4
1057	345000	3147000	66.01	16.51	5.79	1.44	0.29	0.21	4.19	2.63	2.55	5.53	2.2
1058	347000	3147000	58.83	18.12	9.04	0.95	0.23	0.12	1.75	1.29	1.07	5.41	3.6
1059	349000	3147000	64.41	15.4	6.29	1.56	1.13	0.17	1.58	2.56	2.21	7.72	2.9
1080	341000	3145000	72.16	13.82	4.14	1.04	0.23	0.28	2.43	1.75	1.65	5.36	3.5
1081	343000	3145000	68.85	16	5.09	1.68	0.18	0.41	3.21	2.5	2.49	4.76	2.2
1082	345000	3145000	63.88	16.63	6.14	1.44	0.26	0.15	2.7	2.4	2.25	5.44	2.8
1083	347000	3145000	71.35	13.37	5.64	1.23	0.31	0.16	1.73	2.02	1.95	5.53	2.3
1104	339000	3143000	71.76	14.06	3.86	1.16	0.24	0.38	2.72	2.69	2.53	4.05	4.3
1105	341000	3143000	70.77	15.87	4.63	1.32	0.19	0.29	2.93	1.93	1.91	5.01	2.7
1107	345000	3143000	65.67	16.51	5.26	1.88	0.34	0.28	2.96	2.89	2.88	5.63	2
1108	347000	3143000	68.53	14.24	5.99	1.5	0.4	0.2	1.64	2.19	2.11	5.93	2.5
1129	339000	3141000	72.12	13.74	5.41	1.3	0.26	0.24	2.49	1.63	1.52	5.46	3.5
1130	341000	3141000	67.44	16.27	5.01	1.6	0.36	0.29	3.34	3.71	3.7	5.31	1.8
1131	343000	3141000	65.54	15.5	5.06	2.72	1.67	0.26	3.28	2.94	2.35	7.07	1.9
1132	345000	3141000	60.89	15.45	5.84	3.15	3.09	0.15	1.55	4.05	2.92	7.34	5.2
1133	347000	3141000	67.41	14.73	6.01	1.89	0.42	0.26	1.85	2.45	2.25	5.98	4.1
1134	349000	3141000	63.59	16.47	6.57	1.73	0.48	0.27	2.57	2.24	1.98	6.6	2.5
1154	339000	3139000	67.87	16.37	4.76	1.66	0.19	0.3	3.22	3.82	3.81	4.79	2
1155	341000	3139000	64.39	17.33	5.81	1.72	0.3	0.3	3.61	2.77	2.64	5.62	1.7
1156	343000	3139000	64.7	15.25	5.84	1.41	1.22	0.15	2.04	2.54	2.18	7.29	2.3
1157	345000	3139000	66.92	15.14	5.28	1.67	0.46	0.18	1.87	3.55	3.38	5.93	2.2
1158	347000	3139000	66.66	15.23	6.61	1.6	0.22	0.2	2.08	1.73	1.62	5.07	3.1
1159	349000	3139000	65.41	16.29	6.18	1.51	0.25	0.26	3.16	1.82	1.67	5.7	2
1179	339000	3137000	66.15	16.48	5.3	1.71	0.23	0.3	4.19	2.92	2.81	5.16	1.7
1180	341000	3137000	59.71	16.22	8.13	2.24	0.59	0.21	1.77	2.67	2.39	6.39	2.9
1181	343000	3137000	63.78	16.13	6.33	2.45	0.63	0.2	1.86	2.08	1.85	6.45	2.5
1182	345000	3137000	62.89	15.32	6.39	2.07	1.29	0.21	1.84	3.31	3.01	6.98	3
1183	347000	3137000	63.16	16.46	7.08	1.42	0.41	0.17	2.02	2.3	2.15	6.11	4
1184	349000	3137000	64.51	16.92	5.58	1.81	0.41	0.32	4.16	2.06	2	6.4	1.9
1185	351000	3137000	65.34	15.06	5.19	2.77	2.29	0.17	3.07	2.37	1.43	6.9	2.9
1186	353000	3137000	69.3	14.84	5.24	1.47	0.24	0.27	3.15	1.24	1.21	5.59	2.4
1203	337000	3135000	66.16	17.17	6.08	2.39	0.19	0.56	3.61	1.8	1.79	5.21	1.7
1204	339000	3135000	66.82	16.74	5.1	1.7	0.28	0.27	4.04	2.83	2.81	5.36	1.8
1205	341000	3135000	63.61	15.76	6.25	2.75	0.99	0.25	1.97	3.03	2.84	6.95	3
1206	343000	3135000	66.55	14.79	6.3	1.8	0.32	0.24	1.97	2.28	2.11	5.58	2
1207	345000	3135000	60.58	18.49	7.19	1.45	0.26	0.19	2.11	2.06	1.86	5.36	2.9
1208	347000	3135000	63.29	16.64	6.23	1.49	0.42	0.16	2.08	3.25	3.09	5.88	2.7
1209	349000	3135000	64.43	15.54	6.23	1.44	0.7	0.18	4.28	2.79	2.58	6.62	1.7
1210	351000	3135000	66.25	15.53	5.19	1.63	0.35	0.41	3.37	2.12	2.06	6.02	1.8
1211	353000	3135000	65.85	15.26	5.81	1.89	0.7	0.25	3.45	2.19	1.96	6.73	2
1228	337000	3133000	66.47	15.39	6.36	1.38	0.22	0.25	3.42	1.69	1.52	4.88	2.8
1229	339000	3133000	65.35	16.13	6.02	1.89	0.33	0.33	2.85	2.68	2.55	5.22	2.9
1230	341000	3133000	64.67	15.97	6.72	1.42	0.23	0.18	1.98	1.88	1.69	4.95	3.9
1231	343000	3133000	66.79	15.17	6	1.4	0.31	0.2	2.06	2.16	2.06	5.23	2.2
1232	345000	3133000	65.22	16.18	6.18	1.32	0.31	0.19	2.14	2.8	2.64	5.43	3.9
1233	347000	3133000	66.37	15.12	6.23	1.22	0.3	0.17	2.49	2.39	2.16	5.41	2.5
1234	349000	3133000	63.53	16.21	5.2	2.22	2.14	0.17	4.5	2.42	1.79	7.39	2.4
1235	351000	3133000	65.89	15.14	4.74	1.82	1.3	0.32	4.1	1.91	1.53	7.34	1.6
1236	353000	3133000	68.15	14.82	4.42	2.41	0.44	0.51	3.45	1.83	1.79	5.98	1.1
1237	355000	3133000	68.13	15.2	5.73	1.44	0.22	0.26	3.87	1.42	1.36	4.91	1.6
1254	339000	3131000	66.29	14.57	6.65	1.82	0.45	0.26	1.83	2.31	2.25	6.13	2.4
1255	341000	3131000	69.14	13.17	5.54	1.75	0.34	0.23	1.7	2.61	2.46	5.31	2.1
1256	343000	3131000	70.04	13.4	5.62	1.44	0.24	0.19	2.85	2.42	2.21	5.01	1.4
1257	345000	3131000	71.67	12.55	5.26	1.22	0.42	0.17	1.91	2.05	1.92	6.28	1.4
1258	347000	3131000	67.76	14.38	5.04	1.51	1.01	0.28	3.36	2.3	2.12	7.08	1.9
1259	349000	3131000	68.03	14.72	4.14	1.49	0.7	0.33	4.21	2.01	1.84	6.72	1
1260	351000	3131000	69.84	13.57	4.36	1.48	0.76	0.29	3.18	2.28	2.06	6.4	1.4
1261	353000	3131000	70.44	13.66	4.38	1.68	0.28	0.25	2.65	2.25	2.13	5.12	2.4
1280	341000	3129000	73.02	12.52	4.97	1.51	0.45	0.24	2.78	1.88	1.75	5.77	1.3
1281	343000	3129000	70.31	14.14	5.31	1.55	0.42	0.18	3.85	2.04	1.87	5.77	1.3
1282	345000	3129000	67.09	14.62	5.34	1.53	0.76	0.19	3.38	2.89	2.67	7.02	1.7
1283	347000	3129000	67.68	16.32	4.42	1.39	0.14	0.26	4.38	1.58	1.53	4.67	1.3
1285	351000	3129000	61.65	16.23	6.59	3.07	2.71	0.18	2	2.03	1.16	6.67	2.5
1305	341000	3127000	72.65	12.64	5.05	1.31	0.35	0.26	2.24	2.2	2.11	5.22	1.5
1306	343000	3127000	66.22	13.62	5.43	1.81	2.41	0.16	2.55	2.73	2.16	7.75	2.4
1309	349000	3127000	73.27	12.67	4.66	1.24	0.2	0.19	2.22	1.44	1.4	4.96	1.1
1310	351000	3127000	68.18	14.16	6.28	1.4	0.43	0.26	1.94	1.4	1.29	6.19	2.2
1311	353000	3127000	70.95	12.98	5.04	1.32	0.45	0.22	2.22	2.3	2.21	5.9	1.7
1329	339000	3125000	72.22	12.5	5.22	1.44	0.37	0.26	2.43	2.25	2.14	5.27	1.8
1330	341000	3125000	70.14	12.92	5.87	1.15	0.37	0.27	2.31	1.49	1.35	5.4	1.7
1331	343000	3125000	67.44	13.99	5.28	1.36	1.18	0.18	3.21	2.82	2.6	6.91	2
1332	345000	3125000	67.54	15.52	4.83	2.04	0.27	0.39	3.57	1.51	1.46	5.11	1.7
1333	347000	3125000	74.32	12.68	3.67	1.28	0.23	0.25	3.45	1.3	1.27	4.95	0.7
1334	349000	3125000	68.59	14.01	5.77	1.24	0.5	0.18	2	1.4	1.32	6.52	1.8
1335	351000	3125000	69.18	13.66	5.77	1.25	0.33	0.24	2.05	2.3	2.15	5.25	2.5
1336	353000	3125000	70.05	13.88	4.29	1.45	0.36	0.28	3.59	2.42	2.28	5.75	1.5
1354	339000	3123000	69.74	13.05	5.83	1.26	0.43	0.28	2.57	2.13	1.96	5.27	1.5
1355	341000	3123000	67.06	13.74	5.44	1.57	1.35	0.21	2.77	2.69	2.35	7.13	2
1356	343000	3123000	67.77	14.81	5.13	1.21	0.53	0.17	3.98	2.46	2.24	6.37	3.3
1357	345000	3123000	67.37	15.36	4.48	1.94	0.55	0.19	4.3	1.65	1.53	6.78	1.6
1358	347000	3123000	73.46	11.95	4.53	1.2	0.32	0.27	2.3	1.41	1.29	5.42	2.2
1359	349000	3123000	68.41	13.67	5.97	1.36	0.41	0.24	1.79	1.51	1.37	6.35	2.6
1361	353000	3123000	66.5	14.57	4.59	2.66	0.57	0.71	3.44	1.88	1.72	6.4	2
1362	355000	3123000	64.76	15.88	5.26	2.69	0.41	0.49	3.08	1.86	1.76	6.04	1.9
1378	337000	3121000	65.02	16.11	6.66	1.98	0.34	0.22	3.59	1.42	1.29	5.6	1.5
1379	339000	3121000	63.99	16.04	6.72	1.68	0.37	0.33	3.85	1.91	1.89	5.45	1.5
1380	341000	3121000	66.14	16	5.53	1.42	0.25	0.2	4.74	1.71	1.59	5.49	2.3
1381	343000	3121000	64.01	16.26	6.27	1.3	0.27	0.19	3	1.56	1.4	5.31	5.5
1383	347000	3121000	68.5	12.84	5.7	1.08	0.47	0.21	1.95	1.91	1.69	5.59	4.2
1384	349000	3121000	67.83	14.99	5.24	1.27	0.29	0.31	2.58	1.78	1.7	5.6	2.1
1385	351000	3121000	67.11	14.87	5.05	2.3	0.44	0.49	2.86	1.99	1.87	5.7	1.9
1386	353000	3121000	66.76	15.17	4.99	2.54	0.34	0.44	2.85	2.31	2.16	5.48	2.1
1387	355000	3121000	67.29	15.83	4.68	1.58	0.38	0.49	4.36	1.78	1.62	5.37	1.8
1403	337000	3119000	61.55	18.49	7.2	1.68	0.32	0.17	4.71	1.05	0.97	5.56	3.9
1405	341000	3119000	64.68	15.87	6.07	1.1	0.38	0.18	3.77	2.24	2.13	6.17	2.2
1880	341000	3081000	67.38	13.16	4.4	1.18	2.23	0.21	4.02	2.63	2.08	7.79	2.8
1881	343000	3081000	68.69	14.28	4.78	1.12	0.97	0.21	4.38	2.01	1.79	7.26	2.3
1882	345000	3081000	66.49	13.86	4.96	1.39	2.25	0.28	4.25	2.56	2.03	7.83	2.7
1883	347000	3081000	67.06	15.9	5.82	1.47	0.71	0.18	4.08	1.34	1.21	7	2.3
1884	349000	3081000	70.29	14.51	5.43	1.28	0.32	0.23	2.96	1.61	1.53	5.73	2.3
1885	351000	3081000	70.68	14.07	4.71	1.32	0.37	0.2	2.85	3.03	2.99	5.39	2
1886	353000	3081000	67.95	14.46	4.93	1.23	0.67	0.3	4.66	1.98	1.84	7.31	1.8
1887	355000	3081000	71.15	13.8	4.69	1.11	0.58	0.22	3.62	2.09	1.98	7.1	1.8
1888	357000	3081000	76.84	11.03	4.64	0.84	0.16	0.3	2.34	1.25	1.21	5.34	1.3
1889	359000	3081000	74.22	13.01	4.58	0.79	0.18	0.22	3.05	1.41	1.28	5.4	6.5
1890	361000	3081000	71.21	12.96	5.25	0.92	0.35	0.18	4.31	1.56	1.46	6.33	2
1891	363000	3081000	73.2	13.17	4.26	0.88	0.56	0.19	4.19	1.59	1.46	6.61	3.8
1908	347000	3079000	68.84	14.84	5.64	1.19	0.2	0.23	3.29	1.9	1.77	4.89	1.2
1910	351000	3079000	72.47	13.53	4.44	1.25	0.32	0.22	4.23	1.72	1.69	6.17	1
1911	353000	3079000	69.85	13.65	5.13	1.07	0.37	0.2	4.79	1.54	1.36	6.68	1.3
1912	355000	3079000	72.29	12.58	5.92	0.89	0.18	0.17	2.74	1.06	1.01	5.49	1.6
1913	357000	3079000	76.3	11.54	4.37	0.94	0.22	0.18	2.28	2.22	2.16	5.28	2.5
1914	359000	3079000	70.52	12.65	6.36	1.01	0.35	0.23	3.84	1.47	1.4	6.66	1.9
1915	361000	3079000	72.42	12.98	4.62	1.08	0.47	0.21	3.85	1.77	1.67	6.53	1.7
1928	337000	3077000	63.91	16.6	6.67	1.36	0.5	0.13	3.51	0.94	0.8	7.65	4.7
1929	339000	3077000	69.13	14.01	5.02	1.18	0.54	0.21	3.91	1.79	1.6	6.99	3.7
1930	341000	3077000	70.64	14.04	4.28	1.05	0.69	0.2	4.8	1.91	1.77	7.14	1
1931	343000	3077000	70.82	14.28	4.75	1.12	0.27	0.19	5.78	1.19	1.1	5.87	1.8
1932	345000	3077000	71.54	13.77	4.99	1.3	0.41	0.3	3.23	1.8	1.75	5.8	1.1
1933	347000	3077000	73.58	13.2	3.98	1.25	0.21	0.38	2.63	2.08	1.97	4.95	0.9
1953	337000	3075000	69.24	14.39	4.31	1.44	0.68	0.39	5.03	1.9	1.75	7.19	1.7
1954	339000	3075000	69.31	14.36	5.09	1.26	0.4	0.23	4.23	1.77	1.65	6.79	6.4
1955	341000	3075000	69.73	14.24	4.9	1.04	0.25	0.18	4.04	2.41	2.25	5.48	1.2
1956	343000	3075000	70.88	14.07	4.76	1.42	0.62	0.27	4.11	1.78	1.6	6.54	1.5
1957	345000	3075000	72.83	13.01	4.48	1.24	0.45	0.27	3.29	1.85	1.79	6.21	1.9
1958	347000	3075000	73.3	12.41	4.65	1	0.28	0.24	2.76	1.83	1.77	5.89	1.6
1979	339000	3073000	69.78	14.68	4.5	1	0.29	0.18	4.25	1.77	1.65	5.7	3.1
1980	341000	3073000	68.99	14.85	5.06	1.38	0.32	0.35	4.51	1.68	1.57	6.26	1.3
1981	343000	3073000	71.55	13.78	5.16	1.19	0.19	0.25	3.03	1.85	1.75	5.03	2.2
1982	345000	3073000	74.7	12.27	3.8	0.87	0.18	0.23	2.4	2.65	2.57	4.92	3.7
2005	341000	3071000	69.96	14.84	4.97	1.46	0.33	0.36	3.42	1.97	1.82	5.59	1.7
2006	343000	3071000	74.58	12.91	3.56	0.92	0.15	0.19	2.46	2.93	2.91	4.76	3.2
1916	363000	3079000	75.5	12.16	4.68	0.9	0.14	0.13	2.44	1.75	1.65	4.77	2.6
1903	337000	3079000	66.89	13.71	4.24	1.31	2.85	0.3	3.74	2.45	1.91	7.36	1.2
1904	339000	3079000	65.96	14.01	4.64	1.34	2.6	0.23	3.88	3	2.38	7.75	1.7
1905	341000	3079000	68.54	14.43	5.12	1.35	0.89	0.24	3.31	2.6	2.41	7.19	1.6
1906	343000	3079000	68.39	14.05	4.4	1.2	1.92	0.23	4.19	2.98	2.55	7.34	2.9
1907	345000	3079000	70.16	13.9	5.7	1.07	0.35	0.2	3.42	1.61	1.55	6.46	2.5
1892	365000	3081000	74.42	11.85	5.54	1.16	0.15	0.11	2.68	1.6	1.52	4.83	3.4
1857	345000	3083000	67.57	13.08	4.26	1.06	2.83	0.25	4.68	2.72	2.12	7.91	2.2
1858	347000	3083000	67.09	14.45	4.68	1.19	1.78	0.23	4.54	1.97	1.65	7.59	3.3
1859	349000	3083000	70.88	14.18	4.51	1.2	0.34	0.28	4.42	1.38	1.33	6.56	1.4
1860	351000	3083000	68.93	13.96	4.78	0.97	1.38	0.18	3.26	2.48	2.25	7.37	2.4
1861	353000	3083000	72.45	13.01	4.62	0.95	0.44	0.18	3.53	1.57	1.5	6.77	1.2
1862	355000	3083000	71.06	13.97	4.04	1.26	0.37	0.3	4.13	2.15	2.13	6.28	1.4
1863	357000	3083000	75.1	12.73	4.2	0.97	0.2	0.19	2.57	1.59	1.55	5.09	2.1
1864	359000	3083000	74.98	12.29	4.95	0.91	0.13	0.17	2.47	1.71	1.69	5.01	2.6
1865	361000	3083000	76.64	12.13	4.14	0.84	0.15	0.15	2.74	1.59	1.58	4.84	2.9
1866	363000	3083000	73.6	12.46	4.66	1.06	0.44	0.21	3.15	2.06	1.98	6.48	2.8
1867	365000	3083000	75.88	11.37	4.98	1.21	0.33	0.11	2.35	1.81	1.7	5.69	3.5
1878	337000	3081000	70.71	14.35	4.38	1.24	0.32	0.37	3.83	1.52	1.4	5.91	1.1
1879	339000	3081000	64.02	13.9	4.42	1.69	3.65	0.39	3.6	2.99	2.13	7.98	1.9
1835	351000	3085000	69.47	14.42	4.61	1.57	0.62	0.39	4.65	1.73	1.69	6.98	1
1836	353000	3085000	69.01	13.76	5	1.21	1.02	0.23	4.22	1.6	1.58	7.28	1.6
1837	355000	3085000	70.91	13.14	5.27	1.19	0.62	0.25	3.45	1.54	1.41	7.28	2.4
1838	357000	3085000	71.57	13.37	5.26	1.22	0.26	0.25	2.91	1.43	1.36	5.56	1.6
1839	359000	3085000	73.59	12.85	5.09	0.82	0.18	0.23	2.46	1.25	1.19	5.2	1.4
1840	361000	3085000	76.96	11.66	3.84	0.97	0.23	0.2	2.33	1.79	1.79	5.28	3.7
1841	363000	3085000	75.77	11.65	4.74	1	0.23	0.15	2.37	1.71	1.67	5.26	3.1
1842	365000	3085000	77.55	11.6	3.67	1.28	0.2	0.1	2.26	2.1	2.02	5.16	5.4
1853	337000	3083000	70.22	13.88	5.17	0.98	0.76	0.13	2.29	1.72	1.57	6.83	1.4
1854	339000	3083000	64.6	15.8	4.85	1.41	1.87	0.35	3.83	2.36	1.98	6.89	1.6
1855	341000	3083000	63.69	13.66	4.12	1.48	3.98	0.5	3.9	2.97	2.15	7.99	2.1
1856	343000	3083000	67.61	13.23	4.38	1.18	2.37	0.25	4.47	2.55	2.04	7.67	1.5
1813	357000	3087000	69.64	14.22	5.07	1.31	0.38	0.39	3.89	1.58	1.49	6.1	2
1814	359000	3087000	76.91	11.89	3.96	0.83	0.18	0.23	2.41	1.24	1.21	5.26	2.9
1815	361000	3087000	76.17	12.97	4.21	0.95	0.15	0.17	2.37	1.19	1.18	4.75	1.5
1816	363000	3087000	77.92	11.84	4.01	0.97	0.22	0.28	2.01	1.24	1.24	5.44	1.2
1827	335000	3085000	66.94	15.67	6.16	1.09	0.37	0.13	1.96	1.68	1.59	6.37	3
1828	337000	3085000	67.14	15.84	6.17	1.35	0.31	0.18	2.87	1.27	1.19	6.02	1.5
1829	339000	3085000	68.35	13.86	4.76	1.23	1.34	0.42	3.3	1.79	1.58	7.33	0.7
1830	341000	3085000	65.76	13.94	4.36	1.34	3.04	0.55	3.8	2.25	1.64	7.19	1
1831	343000	3085000	64.04	13.88	4.28	1.53	4.07	0.52	3.75	2.62	1.81	7.87	1
1832	345000	3085000	65.35	13.48	4.2	1.59	3.36	0.49	3.58	2.8	2.09	7.91	1.4
1833	347000	3085000	70.03	14.61	4.39	1.42	0.66	0.28	4.89	1.77	1.64	6.98	1
1834	349000	3085000	68.67	14.71	4.6	1.75	0.63	0.55	3.95	1.73	1.58	7.23	1.1
1791	363000	3089000	74.04	13.26	4.57	1.1	0.33	0.4	2.46	1.13	1.06	5.7	1.2
1802	335000	3087000	67.1	15.27	6.45	0.89	0.23	0.14	1.9	1.54	1.46	5.24	3.3
1803	337000	3087000	67.83	15.26	5.75	1.09	0.38	0.14	2.61	1.42	1.3	6.57	2
1804	339000	3087000	68.36	14.19	5.07	1.11	0.95	0.22	2.72	1.71	1.52	7.3	1.2
1805	341000	3087000	70.91	13.94	4.73	1.21	0.54	0.43	3.42	1.54	1.41	6.82	1
1806	343000	3087000	68.1	13.39	4.24	1.29	2.37	0.46	3.14	2.41	1.89	7.65	0.8
1807	345000	3087000	72.08	13.3	4.46	1.39	0.33	0.53	3.45	1.17	1.12	5.6	1.1
1808	347000	3087000	73.73	12.39	4.06	1.18	0.43	0.48	2.68	1.63	1.52	6.18	0.8
1809	349000	3087000	69.79	12.94	3.99	1.13	2.05	0.43	3.04	2.15	1.91	6.95	0.6
1810	351000	3087000	73.64	12.4	4.51	1.21	0.29	0.21	2.55	1.34	1.23	5.28	1.3
1811	353000	3087000	71.19	13.8	4.26	1.24	0.41	0.33	4.12	1.94	1.87	6.24	1.6
1788	357000	3089000	69.72	14.83	4.78	1.31	0.29	0.29	3.98	1.51	1.43	5.48	3.8
1789	359000	3089000	70.87	14.11	4.37	1.25	0.22	0.37	3.66	1.62	1.58	5.28	1.1
1790	361000	3089000	76.4	11.52	4.24	0.7	0.53	0.22	2.21	1.47	1.35	6.56	1.2
1782	345000	3089000	69.68	12.9	4.14	1.36	1.74	0.54	2.76	2.14	1.77	7.2	1.2
1783	347000	3089000	68.06	14.95	5.39	1.52	0.29	0.4	4	1.4	1.35	5.36	2.4
1784	349000	3089000	67.56	13.92	4.77	1.33	2.12	0.36	3.56	1.9	1.48	7.42	1.2
1785	351000	3089000	68.79	15.57	4.12	1.19	0.37	0.5	4.47	1.48	1.36	6.3	0.8
1786	353000	3089000	67.17	15.11	4.29	1.52	0.96	0.48	4.64	1.79	1.64	6.73	1.3
1779	339000	3089000	68.18	14.21	5.39	1.18	0.61	0.18	2.58	2.04	1.89	6.83	2
1780	341000	3089000	70.62	13.91	4.27	1.21	0.35	0.42	3.53	1.72	1.6	6.1	2.1
1766	363000	3091000	68.37	12.4	4.52	2.65	2.46	0.55	2.17	1.83	1.02	7.73	1.9
1767	365000	3091000	69	12.94	4.59	1.89	1.43	0.96	2.34	1.13	0.89	7.94	1.7
1768	367000	3091000	70.95	13.12	4.65	1.88	0.65	0.75	2.33	1.22	1.11	6.92	1.1
1777	335000	3089000	64.93	15.75	6.34	1.17	0.82	0.15	2	2.07	1.87	7.05	3.5
1778	337000	3089000	69.19	14.26	5.72	1.01	0.22	0.13	2.17	1.44	1.31	5.51	2.6
1761	353000	3091000	72.39	13.84	3.86	0.81	0.25	0.34	4.21	1.22	1.11	5.6	0.8
1757	345000	3091000	69.44	14.43	4.73	1.23	0.54	0.38	3.97	1.64	1.52	6.96	1.4
1758	347000	3091000	67.48	13.92	4.51	1.42	2	0.4	3.6	2.17	1.74	7.55	1.4
1741	363000	3093000	71.06	13.12	5.04	1.41	0.83	0.53	2.6	1.23	1.09	7.38	2.6
1742	365000	3093000	70.68	13.27	4.88	1.87	0.89	0.77	2.42	1.34	1.23	7.4	1.2
1743	367000	3093000	75.46	11.44	3.59	1.13	0.27	0.41	1.91	0.85	0.82	5.76	0.9
1744	369000	3093000	73	11.98	3.85	1.24	0.35	0.52	2.1	1.54	1.5	5.67	1.1
1752	335000	3091000	60.69	16.36	6.3	1.3	1.42	0.19	2.26	2.91	2.58	7.68	2.8
1753	337000	3091000	68.83	14.35	5.55	1.04	0.3	0.15	2.14	1.7	1.58	5.94	3.7
1754	339000	3091000	67.96	14.11	4.27	1.1	0.78	0.26	3.2	2.66	2.48	7.57	1.6
1755	341000	3091000	67.01	13.45	4.26	1.31	2.63	0.36	3.02	2.44	1.89	7.3	1.3
1733	347000	3093000	69.92	13.71	4.55	1.25	0.4	0.38	3.75	1.45	1.38	6.76	2.1
1736	353000	3093000	69.45	14.23	5.06	0.89	0.26	0.16	3.69	1.32	1.24	5.6	1.1
1106	343000	3143000	67.09	16.44	5.22	1.64	0.28	0.38	3.55	2.04	1.89	5.38	1.9
1284	349000	3129000	67.39	13.45	4.48	1.9	1.76	0.28	3.36	2.29	1.67	6.89	1.6
1286	353000	3129000	66.47	14.96	6.14	1.47	0.38	0.24	2.32	2.06	1.87	5.73	2
1307	345000	3127000	61.52	16.38	6.28	1.54	0.75	0.22	4.05	2.32	2.01	6.93	2.4
1308	347000	3127000	64.65	15.36	4.66	1.43	1.11	0.23	4.04	3.14	2.81	6.92	1.3
1312	355000	3127000	65.99	15.26	4.28	1.49	0.39	0.32	4.77	2.33	2.11	6.67	2.2
1360	351000	3123000	67.9	13.92	5.82	1.55	0.48	0.22	2.45	1.69	1.46	5.86	4.9
1367	365000	3123000	75.46	11.79	4.78	0.72	0.11	0.15	1.97	1.6	1.46	5.14	3.6
1382	345000	3121000	67.27	14.01	5.48	1.78	0.53	0.21	2.76	1.88	1.68	6.65	1.7
1390	361000	3121000	66.15	15.96	4.33	2.11	0.36	0.7	3.54	2.39	2.23	5.94	1.6
1391	363000	3121000	69.2	14.98	4.73	1.44	0.27	0.32	3.48	1.91	1.87	5.57	1.6
1392	365000	3121000	70.56	13.88	5.7	1.03	0.26	0.15	3.13	1.44	1.29	5.63	2.6
1393	367000	3121000	67.64	15.03	5.43	1.47	0.3	0.56	2.73	1.28	1.21	5.85	2.2
1394	369000	3121000	68.61	14.9	5.14	0.99	0.28	0.2	3.23	1.27	1.14	5.85	2.1
1395	371000	3121000	70.9	13.87	5.9	0.9	0.23	0.13	2.72	1.08	1.04	5.44	2.4
1404	339000	3119000	60.69	18.52	7.05	1.77	0.21	0.2	4.26	1.52	1.41	4.99	1.5
1406	343000	3119000	64.4	15.85	5.91	1.44	0.53	0.18	2.93	2.38	2.11	6.3	2.2
1407	345000	3119000	67.76	14.35	6.04	1.22	0.33	0.19	2.04	1.44	1.28	5.84	2.1
1408	347000	3119000	60.72	17.43	7.45	1.4	0.66	0.19	2.02	2.07	1.81	6.18	3.3
1409	349000	3119000	68.16	14.17	5.32	1.45	0.28	0.35	2.97	1.65	1.47	5.37	1.8
1410	351000	3119000	66.34	14.56	4.61	1.84	0.63	0.51	3.23	2.99	2.78	6.63	1.6
1411	353000	3119000	67.02	15.34	4.28	2.04	0.33	0.72	3.42	2.22	2.04	5.32	2
1412	355000	3119000	64.82	14.9	4.86	1.88	0.82	0.58	3.42	2.56	2.29	6.81	1.3
1413	357000	3119000	64.71	16.06	4.78	2.09	0.36	0.5	3.89	2.47	2.33	5.5	1.9
1414	359000	3119000	66.25	14.26	4.66	2.26	0.71	0.89	3.41	2.14	2.03	6.83	1.2
1415	361000	3119000	69.9	13.67	4.05	1.66	0.39	0.65	3.21	1.99	1.92	5.99	1.3
1416	363000	3119000	68.22	14.34	4.69	1.54	0.39	0.59	3.6	1.35	1.29	6.47	2.5
1417	365000	3119000	68.75	13.2	4.93	1.46	0.94	0.36	3.52	1.69	1.49	6.89	1.6
1418	367000	3119000	65.83	15.34	5.15	1.55	0.8	0.51	3.26	1.44	1.24	6.91	2
1419	369000	3119000	69.91	13.27	4.57	1.23	0.46	0.27	3.61	1.52	1.41	6.63	1.3
1420	371000	3119000	72.64	12.33	5.66	0.96	0.27	0.17	3.01	1.09	1.06	5.78	1.5
1428	337000	3117000	68.67	13.1	5.97	1.29	0.35	0.22	2.61	1.61	1.52	5.31	1.5
1429	339000	3117000	64.74	15.34	6.24	1.58	0.6	0.2	3.31	2.02	1.91	6.49	1.7
1430	341000	3117000	65.58	15.95	6.01	1.34	0.24	0.16	2.81	1.88	1.82	5.51	2.1
1431	343000	3117000	66.17	15.56	5.26	1.42	0.28	0.2	3.86	1.62	1.53	5.44	1.7
1432	345000	3117000	72.79	11.99	4.52	1.16	0.28	0.21	2.28	1.73	1.64	5.43	1.6
1433	347000	3117000	62.62	15.25	5.44	1.54	2.33	0.27	2.6	2.47	1.98	6.96	2.3
1434	349000	3117000	67.86	14.09	4.85	1.91	0.49	0.57	3.13	1.71	1.6	6.51	1.5
1435	351000	3117000	65.45	15.29	4.66	1.91	0.36	0.68	3.82	1.85	1.75	5.46	1.4
1436	353000	3117000	62.83	15.44	5.42	2.15	0.5	0.7	3.59	2.7	2.64	5.89	1.7
1437	355000	3117000	65.42	15.12	4.57	2.07	0.46	0.72	4.07	1.74	1.62	6.24	1.6
1438	357000	3117000	64.83	15.57	4.51	1.89	0.86	0.54	3.57	2.07	1.92	6.87	1.3
1439	359000	3117000	71.06	13.29	3.91	1.75	0.29	0.63	2.88	1.47	1.46	5.4	1.1
1440	361000	3117000	69.62	13.14	4.58	1.9	0.33	0.71	2.79	1.45	1.43	5.47	1.4
1441	363000	3117000	69.83	13.1	3.79	1.47	0.42	0.42	4.14	2.08	1.96	6.4	1.2
1442	365000	3117000	66.81	15.07	5.64	1.33	0.2	0.33	3.06	1.33	1.27	5.03	2.5
1443	367000	3117000	65.05	16.15	5.85	1.51	0.27	0.43	3.28	0.89	0.85	5.89	2.5
1444	369000	3117000	71.68	12.26	4.45	0.93	0.46	0.21	3.47	1.64	1.6	6.76	1.8
1453	337000	3115000	66.54	14.53	6.54	1.35	0.24	0.22	3.15	1.35	1.33	5.07	1.5
1454	339000	3115000	67.06	14.44	5.63	1.6	0.56	0.24	3.14	1.76	1.57	6.11	1.6
1455	341000	3115000	61.19	16.15	6.74	1.38	1.06	0.15	2.59	2.49	2.23	6.87	2.3
1456	343000	3115000	68.97	13.38	5.41	1.39	0.36	0.2	2.62	1.42	1.29	6.13	2.3
1457	345000	3115000	70.76	12.39	5.09	1.1	0.33	0.19	2.34	1.65	1.58	5.91	2.2
1458	347000	3115000	63.97	14.26	4.38	1.9	1.25	0.44	4.08	3.28	3.12	7.69	1.4
1459	349000	3115000	67.67	13.58	3.96	2.22	0.46	0.73	3.25	2.38	2.36	5.82	1.3
1460	351000	3115000	66.5	13.77	4.71	2.02	0.69	0.66	3.27	2.09	2.01	6.92	2.8
1461	353000	3115000	67.38	13.91	4.28	1.91	0.57	0.64	3.41	2.01	1.98	6.6	2.2
1462	355000	3115000	69.07	14.19	3.75	1.19	0.22	0.53	3.66	1.83	1.82	4.98	1.5
1463	357000	3115000	68.41	14.56	3.7	1.28	0.21	0.59	3.7	1.75	1.75	5.29	4
1464	359000	3115000	65.85	14.34	4.33	1.75	0.98	0.65	3.46	1.92	1.82	7.03	1.1
1465	361000	3115000	68.91	13.01	4.14	1.56	0.38	0.59	3.25	2.16	1.84	6.08	11.7
1466	363000	3115000	67.01	12.53	4.35	1.46	1.49	0.45	4.19	1.94	1.62	7.11	2
1467	365000	3115000	67.74	14.06	4.53	1.38	0.39	0.65	3.66	1.24	1.21	6.56	1.9
1468	367000	3115000	65.7	15.05	6.01	1.37	0.21	0.27	3.07	1.19	1.14	5.08	3.4
1477	335000	3113000	73.25	10.88	4.72	1.06	0.33	0.29	1.94	2.15	2.11	4.86	1.9
1478	337000	3113000	62.79	15.96	6.98	1.58	0.48	0.23	3.43	1.8	1.74	6.14	1.5
1479	339000	3113000	64.3	15.46	6.18	1.18	0.32	0.17	3.24	2.28	2.17	5.59	2
1480	341000	3113000	66.75	14.15	5.13	1.22	0.29	0.21	4.08	1.61	1.53	5.79	1.5
1481	343000	3113000	69.69	13.18	4.75	1.33	0.24	0.23	2.65	1.58	1.52	5.09	1.5
1482	345000	3113000	67.2	14.21	5	1.52	0.45	0.19	3.73	1.46	1.45	6.5	1.9
1483	347000	3113000	64.31	14.56	4.8	2.39	1.02	0.74	3.76	1.94	1.83	7.38	1.4
1484	349000	3113000	65.73	14.51	4.53	1.67	0.45	0.62	3.91	1.62	1.6	6.73	1.6
1485	351000	3113000	65.29	14.61	4.33	2.07	0.52	0.73	3.43	2.83	2.73	6.11	1.4
1486	353000	3113000	65.87	14.49	4.89	1.74	0.43	0.53	3.87	1.6	1.56	6.11	1.4
1487	355000	3113000	67.76	14.44	4.06	1.17	0.21	0.49	3.96	1.45	1.43	4.93	1.3
1488	357000	3113000	66.59	14.44	4.45	1.24	0.37	0.48	3.61	1.98	1.95	6.03	1.7
1489	359000	3113000	63.95	14.45	5.37	1.87	0.93	0.65	3.6	1.68	1.55	6.8	1.6
1490	361000	3113000	66.68	14.01	4.58	1.8	0.75	0.63	3.12	2.09	2.01	7.17	1.6
1491	363000	3113000	68.31	13.4	4.82	1.17	0.23	0.44	3.74	1.21	1.2	5.47	1.6
1492	365000	3113000	67.75	14.52	4.94	1.33	0.22	0.38	3.66	1.26	1.21	5.1	1.4
1493	367000	3113000	69.47	13.62	5.31	1.04	0.2	0.16	3.47	1.59	1.55	5.26	2.3
1502	335000	3111000	68.91	13.16	5.43	1.22	0.55	0.23	2.98	1.88	1.77	5.84	3.4
1503	337000	3111000	60.83	15.4	5.5	1.94	2.03	0.23	3.62	3.42	2.95	7.12	1.7
1504	339000	3111000	65.78	13.74	5.3	1.63	0.92	0.25	3.48	2.28	2.01	6.8	1.9
1505	341000	3111000	61.77	14.72	5.82	1.83	2.64	0.14	2.72	2.75	2.06	7.3	2.6
1506	343000	3111000	71.54	12	4.42	1.2	0.63	0.19	1.97	2.28	2.08	6.78	2
1507	345000	3111000	64.21	13.98	4.61	1.69	1.55	0.26	4.16	3.55	3.29	7.72	2.3
1508	347000	3111000	65.73	14.2	4.96	2.05	0.39	0.67	3.81	1.68	1.64	6.44	2.3
1509	349000	3111000	66.79	14.94	4.61	1.92	0.31	0.53	3.57	1.56	1.55	5.32	2.3
1510	351000	3111000	65.32	15.15	5.13	1.8	0.26	0.59	3.96	1.52	1.51	5.36	1.9
1511	353000	3111000	66.42	15.5	4.27	1.44	0.32	0.44	4	1.7	1.6	5.89	1.4
1512	355000	3111000	67.53	14.43	3.79	1.14	0.34	0.67	3.92	1.64	1.58	6.09	1
1513	357000	3111000	66.75	14.06	4.34	1.17	0.46	0.54	3.77	1.83	1.74	6.53	0.9
1514	359000	3111000	66.25	13.26	4.43	1.55	1.61	0.62	3.62	1.52	1.19	7.25	1.1
1515	361000	3111000	68.77	13.95	4.65	1.6	0.26	0.52	3.39	1.57	1.53	5.47	1.5
1516	363000	3111000	66.1	14.97	5.02	1.31	0.37	0.39	3.65	1.32	1.29	6.37	1.6
1517	365000	3111000	70.57	12.63	4.77	0.95	0.3	0.28	3.29	1.73	1.64	5.58	2.3
1518	367000	3111000	70.34	12.95	5.45	1.15	0.3	0.2	3.18	1.49	1.41	5.42	2.1
1527	335000	3109000	66.03	15.52	5.63	1.33	0.36	0.34	3.35	1.55	1.52	5.52	4.9
1528	337000	3109000	65.39	13.83	5.56	1.32	0.95	0.18	2.81	2.93	2.75	7.24	2.6
1529	339000	3109000	63.74	15.84	6.21	1.42	0.68	0.17	2.36	2.38	2.13	6.41	2.5
1530	341000	3109000	66.51	15.13	6.02	1.16	0.21	0.14	2.66	1.41	1.38	5.28	2.2
1531	343000	3109000	65.58	13.66	5.11	1.64	2.21	0.24	2.68	2.57	2.11	7.74	2.3
1532	345000	3109000	65.16	15.41	5.84	1.59	0.41	0.24	4.58	1.48	1.4	6.2	1.5
1533	347000	3109000	67.67	14.42	5.25	1.32	0.32	0.27	2.8	2.45	2.28	5.23	1.7
1534	349000	3109000	65.39	14.72	5.19	1.91	0.8	0.54	3.54	2.12	1.89	7.09	1.2
1535	351000	3109000	69.35	14.22	3.74	1.31	0.26	0.61	4.09	1.61	1.6	5.07	1.2
1536	353000	3109000	68.44	14.91	3.71	1.06	0.29	0.63	4.01	1.85	1.82	5.69	1.6
1537	355000	3109000	70.12	13.85	3.75	1.01	0.22	0.57	4.16	1.49	1.4	4.89	1.4
1538	357000	3109000	69.14	14.24	4.04	0.96	0.19	0.56	4.15	0.99	0.98	5.25	2.1
1539	359000	3109000	68.98	14.3	4.44	1.24	0.28	0.48	3.57	1.49	1.41	5.52	1.6
1540	361000	3109000	66.61	14.8	4.52	1.53	0.71	0.42	3.72	1.82	1.67	7.16	1.2
1541	363000	3109000	65.22	15.81	5.45	1.36	0.36	0.28	3.52	1.57	1.55	6.21	1.3
1542	365000	3109000	70.26	13.22	4.72	1	0.53	0.23	3.71	1.51	1.33	6.82	2.1
1543	367000	3109000	71.4	12.63	5.29	0.98	0.41	0.16	3.21	1.55	1.4	6.23	1.9
1544	369000	3109000	71.38	12.91	4.92	0.94	0.34	0.2	3.62	1.42	1.33	6.19	2.4
1545	371000	3109000	73.13	12.28	4.3	1.07	0.58	0.19	2.87	2.03	1.86	6.63	1.9
1546	373000	3109000	73.86	13.04	4.2	1.06	0.12	0.19	2.28	1.28	1.26	4.9	2.1
1547	375000	3109000	73.95	13.41	4.61	0.86	0.17	0.14	2.13	1.18	1.14	5.13	1.9
1548	377000	3109000	74.24	11.78	4.67	1.26	0.28	0.39	2.18	1.13	1.07	5.77	2.3
1549	379000	3109000	74.98	11.45	4.19	1.34	0.35	0.43	2.19	1.74	1.69	5.51	2.1
1551	333000	3107000	62.76	16.71	6.86	1.38	0.24	0.16	3.3	1.47	1.43	5.18	1.7
1552	335000	3107000	60.23	17.38	7.43	1.34	0.57	0.15	2.38	1.96	1.79	6.4	4.3
1553	337000	3107000	63.61	16.58	7.08	1.27	0.24	0.16	2.66	1.34	1.24	5.7	3.6
1554	339000	3107000	65.58	15.46	6.24	1.31	0.47	0.18	2.22	2.25	2.13	5.99	2.7
1555	341000	3107000	67.14	14.57	6.11	1.36	0.51	0.17	2.25	1.53	1.35	6.55	2.6
1556	343000	3107000	65.86	13.19	4.26	2.16	2.31	0.23	3.51	2.86	2.24	7.73	2.4
1557	345000	3107000	65.42	13.6	4.32	1.97	1.86	0.46	3.37	2.84	2.3	7.56	2.1
1558	347000	3107000	66.33	15.51	4.43	1.81	0.36	0.62	3.9	1.66	1.62	5.36	1.7
1559	349000	3107000	68.02	13.89	4.8	1.64	0.38	0.55	3.63	1.61	1.55	6.07	1.6
1560	351000	3107000	68.31	14.37	4.29	1.38	0.22	0.52	4.05	1.44	1.33	5.26	1.9
1561	353000	3107000	69.69	13.48	4.04	1	0.38	0.45	3.84	1.42	1.29	6.14	4.5
1562	355000	3107000	70.24	12.97	4.1	1.02	0.27	0.3	3.98	1.41	1.31	4.94	2.7
1563	357000	3107000	69.17	13.57	4.12	1.03	0.38	0.34	3.63	1.77	1.75	5.94	1.6
1564	359000	3107000	69.4	13.59	4.18	1.35	0.38	0.51	3.45	1.75	1.69	5.8	1.8
1565	361000	3107000	65.88	14.73	4.86	1.4	0.6	0.38	3.81	1.63	1.57	7.11	1.7
1566	363000	3107000	67.55	14.49	4.9	1.36	0.34	0.35	3.16	1.58	1.5	5.58	4.2
1567	365000	3107000	70.84	12.68	4.09	0.97	0.56	0.2	3.95	2.04	1.87	6.85	4
1568	367000	3107000	68.27	14.89	5.72	1.51	0.16	0.3	3.08	1.72	1.69	5.22	3
1569	369000	3107000	72.38	12.84	5.37	1.03	0.16	0.17	2.61	1.53	1.46	5.01	2.6
1570	371000	3107000	74.1	12.09	4.02	1.05	0.27	0.32	2.46	1.75	1.75	5.64	2
1571	373000	3107000	77.21	11.4	2.97	0.92	0.23	0.29	1.97	1.37	1.36	5.44	1.8
1572	375000	3107000	73.35	13.2	3.95	0.98	0.21	0.39	2.51	1.24	1.23	5.26	2.2
1573	377000	3107000	75.52	11.82	3.93	1.02	0.21	0.41	2.1	1.13	1.12	5.27	1.4
1574	379000	3107000	73.03	12.29	4.19	1.47	0.32	0.69	2.24	1.3	1.29	5.88	1.5
1575	381000	3107000	72.59	12.14	4.25	1.8	0.39	0.77	2.19	1.25	1.24	6.02	1.2
1576	333000	3105000	65.21	13.69	6.02	1.15	1.11	0.25	2.49	2.38	2.15	7.08	3.1
1580	341000	3105000	64.42	13.71	5.16	1.95	2.8	0.21	2.48	2.74	1.99	7.37	2.2
1581	343000	3105000	68.08	13.17	4.91	1.47	0.49	0.37	3.34	2.04	1.94	6.7	4.4
1582	345000	3105000	67.61	14	4.34	1.82	0.3	0.66	3.8	1.38	1.37	5.23	1.5
1583	347000	3105000	68.88	13.3	4.38	1.76	0.52	0.66	3.36	1.46	1.41	6.79	0.9
1584	349000	3105000	69.14	13.03	4.15	1.48	0.32	0.55	3.75	1.39	1.35	5.82	1.7
1585	351000	3105000	69.49	13.65	3.63	0.97	0.26	0.55	3.95	1.16	1.15	5.72	1.1
1586	353000	3105000	73.41	11.52	4.01	0.82	0.27	0.28	2.84	1.21	1.14	5.57	1.2
1587	355000	3105000	70.65	12.76	4.53	1.06	0.24	0.2	3.46	1.26	1.25	5.41	1
1588	357000	3105000	70.66	12.95	3.91	0.89	0.19	0.38	3.71	1.24	1.18	5.15	1.4
1589	359000	3105000	68.58	13.08	4.43	1.55	0.98	0.54	3.2	1.66	1.57	6.94	1.3
1590	361000	3105000	65.06	14.91	5.03	1.37	0.95	0.39	3.6	1.88	1.74	7.15	1.9
1591	363000	3105000	68.48	13.69	4.52	1.27	0.29	0.32	3.75	1.8	1.79	5.49	1.6
1592	365000	3105000	71.54	12.67	5.31	1.08	0.29	0.21	2.75	1.31	1.24	6.01	2
1593	367000	3105000	73.16	11.78	5.1	0.94	0.17	0.13	1.77	1.91	1.79	4.99	5.7
1594	369000	3105000	73.96	11.57	3.76	1.39	0.23	0.52	1.92	1.19	1.19	5.22	2.6
1595	371000	3105000	72.38	12.17	4.15	1.48	0.39	0.44	2.07	2.03	1.96	6.07	2.2
1596	373000	3105000	75.46	10.96	3.6	1.21	0.24	0.38	1.87	1.5	1.48	5.33	2
1597	375000	3105000	74.56	11.32	3.56	1.15	0.52	0.49	1.91	1.27	1.24	6.92	1.6
1598	377000	3105000	73.43	11.59	3.98	1.49	0.37	0.6	2.06	1.13	1.12	6.15	1.2
1599	379000	3105000	71.81	12.37	4.2	1.61	0.41	0.62	2.21	1.54	1.52	6.24	1.5
1600	381000	3105000	73.67	12.01	4.53	0.92	0.26	0.27	2.02	1.34	1.31	6	1.1
1605	341000	3103000	69.57	13.04	4.24	1.25	0.31	0.26	3.98	1.62	1.57	5.83	1.9
1606	343000	3103000	65.67	14.57	4.56	1.91	0.37	0.61	4.12	1.97	1.91	6	1.5
1607	345000	3103000	67.44	14.21	4.05	1.78	0.42	0.61	3.6	1.98	1.94	5.87	1.2
1608	347000	3103000	68.7	13.01	4.49	1.43	0.46	0.34	3.92	1.41	1.28	6.44	1.2
1609	349000	3103000	66.63	14.36	4.38	1.24	0.3	0.52	4.35	1.37	1.34	5.7	1.2
1610	351000	3103000	70.6	12.94	3.77	0.97	0.25	0.38	3.63	1.16	1.11	5.33	1.2
1611	353000	3103000	73.62	10.95	4.23	0.97	0.34	0.35	2.22	1.26	1.21	5.64	1.4
1612	355000	3103000	73.77	11.04	4.16	0.84	0.33	0.18	2.4	1.3	1.26	5.86	1.8
1613	357000	3103000	66.96	14.4	4.55	1.15	0.2	0.38	4.18	1.16	1.14	5.46	1.7
1614	359000	3103000	66.42	13.86	4.78	1.77	0.41	0.44	4.15	1.52	1.38	6.66	1.2
1615	361000	3103000	67.62	14.09	4.93	1.56	0.34	0.31	3.05	1.67	1.58	5.94	1.6
1616	363000	3103000	69.58	13.41	5.22	1.13	0.3	0.15	2.73	1.81	1.72	5.84	2
1617	365000	3103000	73.01	11.59	4.06	1	0.23	0.18	2.12	2.76	2.75	5.05	3.6
1618	367000	3103000	74.03	11.33	4.07	1.16	0.38	0.35	2.04	1.46	1.41	5.97	1.6
1619	369000	3103000	73.11	11.42	3.95	1.59	0.41	0.72	2.11	1.11	1.09	6.41	1.4
1620	371000	3103000	73.18	10.24	3.38	1.43	1.4	0.59	1.95	1.26	0.95	7.62	1.4
1621	373000	3103000	75.57	11.72	3.37	1.2	0.38	0.47	1.95	1.16	1.13	6.38	1.3
1622	375000	3103000	70.96	12.91	4.64	1.85	0.42	0.73	2.22	1.45	1.42	5.94	1.3
1623	377000	3103000	71.49	13.29	4.52	1.85	0.43	0.7	2.24	1.08	1.08	6.71	1.1
1624	379000	3103000	72.25	13.74	4.76	1.36	0.26	0.43	2.18	1.23	1.2	5.71	1.4
1629	339000	3101000	71.86	13.12	4.6	1.19	0.31	0.18	2.32	1.59	1.49	5.79	2
1630	341000	3101000	68.05	14.11	4.79	1.58	0.42	0.44	3.66	1.47	1.41	6.38	1.8
1631	343000	3101000	65.74	15.57	4.71	1.83	0.38	0.58	4.09	1.54	1.47	5.97	1.3
1632	345000	3101000	70.38	13.28	4.34	1.71	0.31	0.53	3.38	1.39	1.36	5.41	1.1
1633	347000	3101000	67.15	14.01	4.6	1.54	0.81	0.46	4.05	1.75	1.59	6.58	1
1634	349000	3101000	69.61	13.73	4.16	1.19	0.26	0.51	3.86	1.08	1.03	5.84	0.9
1635	351000	3101000	76.69	11.19	3.86	0.72	0.21	0.18	2.28	1.11	1.01	5.48	1.1
1636	353000	3101000	77.1	10.76	4.17	0.66	0.27	0.19	1.65	1.26	1.21	5.37	1.8
1637	355000	3101000	71.78	13	4.56	0.98	0.25	0.2	3.21	1.13	1.1	5.35	1.6
1638	357000	3101000	69.39	13.18	4.39	1.17	0.36	0.47	3.23	1.67	1.59	5.99	1.6
1639	359000	3101000	66.61	13.8	5.1	1.4	0.72	0.28	4.44	1.56	1.45	7.32	1.3
1640	361000	3101000	70.56	13.06	4.57	1.13	0.38	0.24	3.86	1.37	1.25	6.38	1.4
1641	363000	3101000	67.92	12.41	5.02	1.37	2.16	0.22	2.73	2.35	1.91	7.43	1.2
1642	365000	3101000	74.34	11.43	4.13	1.36	0.32	0.44	2.06	1.32	1.32	5.68	1.9
